# Supplementary material
Source: publisher site journal article supplement (https://www.dovepress.com/article/393163)
Supplement: Supplementary file 1 [file get_supplementary_file.php]

**Appendix A:** Pool of preliminary items

| BODY STRUCTURE (**BS)** |
| --- |
| 1. Knee swilling |
| 1. Knee cracking |
| 1. Knee deformity |
| 1. Knee clicking |
| BODY FUNCTION (**BF)** |
| 1. Knee pain during up stair |
| 1. Knee pain during downstair |
| 1. Knee pain during walking |
| 1. Knee pain during accelerating in the walking |
| 1. Knee pain during Sajud (part from praying movement) |
| 1. Knee pain during up from Sajud |
| 1. Knee pain during sleeping |
| 1. Knee pain on the bed |
| 1. Climbing to avoid knee pain |
| 1. Knee stability during the movement |
| 1. Knee stiffness after sitting |
| 1. The feeling of heat in the posterior part of the knee |
| 1. Knee pain during driving |
| 1. Knee pain during up the car |
| 1. Knee pain during down the car |
| 1. Knee pain during cold weather |
| 1. Knee pain during bend of the knee |
| 1. Knee pain while extending the knee |
| 1. The feeling of knee muscles fatigue. |
| 1. The fear of falling during the walking |
| 1. Frequent repetition of knee pain |
| 1. The intensity of knee pain |
| 1. The knee pain progression |
| 1. The severity of knee stiffness in the morning |
| ACTIVITY AND PARTICIPATION (**AP)** |
| 1. The difficulty during the change the body position |
| 1. The difficulty of staying in one position |
| 1. The difficulty praying on the chair |
| 1. The difficulty during pray on the chair (part Sajud) |
| 1. The difficulty during up from the chair |
| 1. The difficulty during up from the floor |
| 1. The difficulty during sitting on the floor |
| 1. The difficulty during the stair |
| 1. The difficulty during down the stair |
| 1. The difficulty during ablution (washing of feet) |
| 1. The difficulty during use of the Arabic toilet (squat toilet) |
| 1. The difficulty during sitting in praying |
| 1. The difficulty during the use of the western toilet (flush toilet) |
| 1. The difficulty during Sajud |
| 1. The difficulty during the raising from Sajud |
| 1. The difficulty during the bathing |
| 1. The difficulty while wearing the sock and pant |
| 1. The difficulty while picking up the object |
| 1. The difficulty while doing simple home activities |
| 1. The difficulty during getting in\out of the car |
| 1. The difficulty during going to parties |
| 1. The difficulty during the hiking time |
| 1. The difficulty during going to friends |
| 1. The difficulty during sped the leisure time |
| 1. The difficulty during the use of public transport |
| 1. The difficulty while doing the garden activities |
| 1. The difficulty during the shopping |
| 1. The difficulty while doing heavy home activities |
| 1. The difficulty during the dancing |
| 1. The difficulty during sports activities |
| 1. The difficulty during the running |
| 1. The difficulty during the jumbling |
| 1. The difficulty during going to the work |
| 1. The difficulty during the work |
| 1. The difficulty during the sexual relationship |
| 1. The difficulty during the show the TV |
| 1. The difficulty during the nail trim of the toe |
| 1. The ability to help others |
| ENVIRONMENTAL FACTORS (**EF)** |
| 1. The preference for the western toilet on Arabic toilet |
| 1. Use the car to go to the mosque |
| 1. Use the cane in daily activity |
| 1. Use medical shoes in the daily activity |
| 1. The preference for using an elevator over a stair |
| 1. The dependence on using the elevator |
| 1. Absence of assistive device in a public building |
| 1. Satisfaction with health care service |
| 1. The dependence on assistive devices in the town |
| 1. The awareness of the family toward knee problem |
| 1. Use the handrail during using of the stair |
| 1. The awareness of the community toward knee problem |
| 1. The dependence on others helps |
| 1. The patient awareness of the knee problem |
| 1. The feeling of support from others |

**Appendix B.** Content Validity Index based on the grade of patients and experts of preliminary

| **Items** | **Expert 1** | **Expert 2** | **Expert 3** | **Expert 4** | **Expert 5** | **Patient 1** | **Patient 2** | **patient 3** | **Patient 4** | **No rating 3&4** | **I-CVI** | **Pc** | **k** |
| --- | --- | --- | --- | --- | --- | --- | --- | --- | --- | --- | --- | --- | --- |
| **BS 1** | 4 | 4 | 3 | 3 | 3 | 1 | 3 | 4 | 1 | 7 | 0.777 | 0.07 | **0.761** |
| **BS 2** | 4 | 1 | 4 | 1 | 4 | 3 | 2 | 2 | 2 | 4 | 0.444 | 0.246 | 0.263 |
| **BS 3** | 3 | 4 | 2 | 4 | 1 | 3 | 2 | 4 | 1 | 5 | 0.555 | 0.246 | 0.410 |
| **BS 4** | 1 | 1 | 2 | 3 | 2 | 2 | 3 | 3 | 1 | 3 | 0.333 | 0.07 | 0.283 |
| **BF 1** | 3 | 3 | 4 | 4 | 4 | 4 | 4 | 4 | 3 | 9 | 1 | 0.002 | 1 |
| **BF2** | 3 | 4 | 4 | 4 | 4 | 4 | 4 | 4 | 2 | 8 | 0.888 | 0.014 | **0.887** |
| **BF3** | 4 | 4 | 4 | 4 | 4 | 3 | 2 | 4 | 2 | 7 | 0.777 | 0.07 | **0.761** |
| **BF4** | 2 | 3 | 4 | 4 | 3 | 2 | 3 | 4 | 3 | 7 | 0.777 | 0.07 | **0.761** |
| **BF5** | 3 | 4 | 4 | 3 | 4 | 3 | 2 | 4 | 3 | 8 | 0.888 | 0.014 | 0.887 |
| **BF6** | 3 | 4 | 4 | 4 | 4 | 3 | 2 | 4 | 4 | 8 | 0.888 | 0.014 | **0.887** |
| **BF7** | 4 | 2 | 1 | 1 | 3 | 3 | 2 | 2 | 2 | 3 | 0.333 | 0.07 | 0.283 |
| **BF8** | 3 | 3 | 2 | 2 | 2 | 3 | 2 | 2 | 2 | 3 | 0.333 | 0.07 | 0.283 |
| **BF9** | 1 | 3 | 4 | 3 | 4 | 3 | 4 | 2 | 2 | 6 | 0.666 | 0.164 | 0.601 |
| **BF10** | 2 | 3 | 3 | 3 | 2 | 2 | 2 | 3 | 1 | 4 | 0.444 | 0.246 | 0.263 |
| **BF11** | 2 | 3 | 4 | 4 | 3 | 3 | 2 | 2 | 2 | 5 | 0.555 | 0.246 | 0.410 |
| **BF12** | 1 | 1 | 2 | 1 | 1 | 2 | 1 | 1 | 1 | 0 | 0 | 0 | 0 |
| **BF13** | 3 | 3 | 2 | 3 | 3 | 2 | 2 | 1 | 1 | 4 | 0.444 | 0.246 | 0.263 |
| **BF14** | 4 | 3 | 2 | 3 | 3 | 3 | 2 | 2 | 2 | 5 | 0.555 | 0.246 | 0.410 |
| **BF15** | 4 | 3 | 2 | 3 | 3 | 4 | 2 | 2 | 2 | 5 | 0.555 | 0.246 | 0.410 |
| **BF16** | 1 | 1 | 3 | 2 | 3 | 3 | 1 | 2 | 1 | 3 | 0.333 | 0.07 | 0.283 |
| **BF17** | 4 | 4 | 3 | 4 | 4 | 3 | 1 | 4 | 3 | 8 | 0.888 | 0.014 | **0.887** |
| **BF18** | 4 | 2 | 3 | 4 | 3 | 3 | 1 | 2 | 2 | 5 | 0.555 | 0.246 | 0.410 |
| **BF19** | 1 | 1 | 2 | 4 | 3 | 3 | 2 | 1 | 1 | 3 | 0.333 | 0.07 | 0.283 |
| **BF20** | 2 | 4 | 2 | 1 | 2 | 2 | 4 | 1 | 2 | 2 | 0.222 | 0.07 | 0.16 |
| **BF21** | 3 | 4 | 3 | 3 | 3 | 3 | 2 | 2 | 4 | 7 | 0.777 | 0.07 | **0.761** |
| **BF22** | 1 | 4 | 4 | 3 | 4 | 2 | 2 | 2 | 3 | 5 | 0.555 | 0.246 | 0.410 |
| **BF23** | 1 | 4 | 2 | 3 | 2 | 3 | 3 | 2 | 2 | 4 | 0.444 | 0.246 | 0.263 |
| **BF24** | 2 | 2 | 4 | 4 | 4 | 3 | 2 | 2 | 2 | 4 | 0.444 | 0.246 | 0.263 |
| **AP1** | 4 | 2 | 2 | 4 | 3 | 4 | 1 | 2 | 2 | 4 | 0.444 | 0.246 | 0.263 |
| **AP2** | 2 | 3 | 3 | 4 | 3 | 3 | 2 | 3 | 3 | 7 | 0.777 | 0.07 | **0.761** |
| **AP3** | 4 | 2 | 2 | 4 | 4 | 2 | 2 | 2 | 1 | 3 | 0.333 | 0.07 | 0.283 |
| **AP4** | 4 | 4 | 2 | 4 | 4 | 3 | 2 | 4 | 1 | 6 | 0.666 | 0.164 | 0.601 |
| **AP5** | 4 | 4 | 3 | 4 | 4 | 2 | 3 | 3 | 2 | 7 | 0.777 | 0.07 | **0.761** |
| **AP6** | 4 | 4 | 4 | 4 | 4 | 4 | 3 | 4 | 3 | 9 | 1 | 0.002 | **1** |
| **AP7** | 4 | 4 | 4 | 4 | 4 | 4 | 2 | 2 | 2 | 6 | 0.666 | 0.164 | 0.601 |
| **AP8** | 4 | 3 | 4 | 4 | 3 | 4 | 2 | 3 | 3 | 8 | 0.888 | 0.014 | **0.887** |
| **AP9** | 4 | 4 | 4 | 4 | 3 | 4 | 2 | 3 | 2 | 7 | 0.777 | 0.07 | **0.761** |
| **AP10** | 3 | 2 | 3 | 3 | 4 | 4 | 4 | 2 | 1 | 6 | 0.666 | 0.164 | 0.601 |
| **AP11** | 4 | 4 | 4 | 4 | 4 | 4 | 4 | 4 | 4 | 9 | 1 | 0.002 | **1** |
| **AP12** | 4 | 4 | 4 | 4 | 4 | 4 | 2 | 4 | 4 | 8 | 0.888 | 0.014 | **0.887** |
| **AP13** | 4 | 2 | 2 | 4 | 3 | 2 | 2 | 2 | 2 | 3 | 0.333 | 0.07 | 0.283 |
| **AP14** | 4 | 4 | 4 | 4 | 4 | 3 | 2 | 4 | 2 | 7 | 0.777 | 0.07 | **0.761** |
| **AP15** | 4 | 3 | 3 | 4 | 4 | 3 | 2 | 4 | 3 | 8 | 0.888 | 0.014 | **0.887** |
| **AP16** | 3 | 1 | 2 | 4 | 3 | 2 | 2 | 1 | 1 | 3 | 0.333 | 0.07 | 0.283 |
| **AP17** | 4 | 2 | 2 | 3 | 2 | 4 | 4 | 1 | 1 | 4 | 0.444 | 0.246 | 0.263 |
| **AP18** | 2 | 1 | 2 | 3 | 2 | 3 | 4 | 2 | 1 | 3 | 0.333 | 0.07 | 0.283 |
| **AP19** | 3 | 4 | 3 | 4 | 3 | 3 | 4 | 1 | 2 | 7 | 0.778 | 0.07 | 0.761 |
| **AP20** | 2 | 4 | 2 | 4 | 3 | 4 | 2 | 2 | 2 | 4 | 0.444 | 0.246 | 0.263 |
| **AP21** | 4 | 4 | 3 | 3 | 2 | 2 | 1 | 1 | 1 | 4 | 0.444 | 0.246 | 0.263 |
| **AP22** | 3 | 4 | 3 | 2 | 2 | 2 | 1 | 1 | 1 | 3 | 0.333 | 0.07 | 0.283 |
| **AP23** | 2 | 4 | 3 | 2 | 3 | 3 | 1 | 1 | 1 | 4 | 0.444 | 0.246 | 0.263 |
| **AP24** | 3 | 4 | 3 | 2 | 1 | 3 | 1 | 1 | 1 | 4 | 0.444 | 0.246 | 0.263 |
| **AP25** | 1 | 1 | 1 | 4 | 1 | 2 | 2 | 1 | 1 | 1 | 0.111 | 0.018 | 0.094 |
| **AP26** | 1 | 2 | 1 | 3 | 2 | 1 | 2 | 2 | 1 | 1 | 0.111 | 0.018 | 0.094 |
| **AP27** | 1 | 4 | 3 | 3 | 2 | 3 | 2 | 2 | 1 | 4 | 0.444 | 0.246 | 0.263 |
| **AP28** | 2 | 4 | 3 | 4 | 3 | 3 | 4 | 3 | 3 | 8 | 0.889 | 0.014 | **0.887** |
| **AP29** | 2 | 4 | 1 | 2 | 1 | 3 | 4 | 4 | 4 | 5 | 0.556 | 0.246 | 0.410 |
| **AP30** | 4 | 4 | 3 | 3 | 2 | 3 | 2 | 4 | 2 | 6 | 0.667 | 0.164 | 0.601 |
| **AP31** | 2 | 4 | 3 | 3 | 1 | 4 | 4 | 4 | 3 | 7 | 0.778 | 0.07 | **0.761** |
| **AP32** | 1 | 2 | 3 | 4 | 1 | 4 | 4 | 4 | 4 | 6 | 0.666 | 0.164 | 0.601 |
| **AP33** | 3 | 4 | 3 | 4 | 3 | 3 | 2 | 3 | 1 | 7 | 0.777 | 0.07 | **0.761** |
| **AP34** | 4 | 4 | 2 | 4 | 3 | 1 | 1 | 1 | 1 | 4 | 0.444 | 0.246 | 0.263 |
| **AP35** | 3 | 2 | 2 | 4 | 2 | 2 | 4 | 3 | 1 | 4 | 0.444 | 0.246 | 0.263 |
| **AP36** | 1 | 1 | 1 | 1 | 3 | 1 | 1 | 2 | 1 | 1 | 0.111 | 0.018 | 0.094 |
| **AP37** | 2 | 1 | 2 | 1 | 2 | 2 | 2 | 3 | 3 | 2 | 0.222 | 0.07 | 0.163 |
| **AP38** | 4 | 4 | 2 | 2 | 3 | 1 | 2 | 2 | 2 | 3 | 0.333 | 0.07 | 0.283 |
| **EF1** | 3 | 4 | 3 | 4 | 3 | 3 | 4 | 4 | 4 | 9 | 1 | 0.002 | **1** |
| **EF2** | 4 | 4 | 3 | 3 | 3 | 3 | 3 | 4 | 2 | 8 | 0.889 | 0.014 | **0.887** |
| **EF3** | 4 | 4 | 4 | 3 | 4 | 2 | 4 | 4 | 1 | 7 | 0.777 | 0.07 | **0.761** |
| **EF4** | 2 | 4 | 3 | 2 | 3 | 3 | 2 | 1 | 2 | 4 | 0.444 | 0.246 | 0.263 |
| **EF5** | 4 | 4 | 3 | 3 | 4 | 4 | 2 | 4 | 4 | 8 | 0.888 | 0.014 | **0.887** |
| **EF6** | 4 | 4 | 2 | 3 | 4 | 3 | 1 | 4 | 2 | 6 | 0.666 | 0.164 | 0.601 |
| **EF7** | 2 | 3 | 3 | 2 | 3 | 3 | 1 | 3 | 1 | 5 | 0.555 | 0.246 | 0.410 |
| **EF8** | 3 | 4 | 2 | 4 | 4 | 3 | 4 | 4 | 3 | 8 | 0.888 | 0.014 | **0.887** |
| **EF9** | 2 | 1 | 2 | 3 | 2 | 2 | 2 | 3 | 2 | 2 | 0.222 | 0.07 | 0.163 |
| **EF10** | 4 | 1 | 2 | 3 | 4 | 2 | 4 | 4 | 4 | 6 | 0.666 | 0.164 | 0.601 |
| **EF11** | 4 | 4 | 3 | 3 | 3 | 3 | 2 | 4 | 4 | 8 | 0.888 | 0.014 | **0.887** |
| **EF12** | 1 | 2 | 2 | 1 | 2 | 2 | 1 | 3 | 4 | 2 | 0.222 | 0.07 | 0.163 |
| **EF13** | 3 | 4 | 3 | 3 | 4 | 3 | 1 | 2 | 2 | 6 | 0.666 | 0.164 | 0.601 |
| **EF14** | 1 | 3 | 2 | 1 | 2 | 2 | 1 | 3 | 4 | 3 | 0.333 | 0.07 | 0.283 |
| **EF15** | 3 | 2 | 3 | 2 | 2 | 2 | 2 | 4 | 4 | 4 | 0.444 | 0.246 | 0.263 |

*1 = not relevant, 2 = somewhat relevant, 3 = quite relevant, 4 = highly relevant; CVI, content validity index; I-CVI, Item-level CVI; K*, the multi-rater kappa statistic. BS, Body structure; BF, Body function; AP, Activity & Participation; EF, environmental factor

# Appendix C. The New Arabic Patient-Reported Outcome Measure

**مقياس الالتهاب المفصلي العظمي للركبة**

الاسم :................................................................... تاريخ اليوم:......../......../..............

ضع علامة صح ( ) أمام كل إجابة تكون مناسبة لحالتك. أمام كل سؤال اختر مربع واحد فقط. إذا كنت غير متأكد من الإجابة قم باختيار أقرب إجابة لك.

**أجزاء الجسم**

يرجى أن تكون الإجابة على هذا السؤال بناء على تغير في أجزاء وتركيب ركبتك خلال **الأسبوع الماضي** :

1. **هل هناك تورم أو انتفاخ في ركبتك؟**

أبدا نادراً أحيانا غالباً دائما

**وظائف الجسم**

الأسئلة التالية تتعلق بوظائف الجسم مثل الإحساس بالألم والعواطف وتحريك المفاصل.

**الألم**

1. **كم مرة تشعر بألم الركبة؟**

أبداً شهرياً أسبوعياً يومياً دائماً

ما هو مقدار ألم الركبة الذي عانيته **الأسبوع الماضي** أثناء أداء الأنشطة التالية:

1. **صعود أو نزول الدرج لطابق واحد**

لا يوجد ألم ألم خفيف متوسط شديد شديد جداً

1. **المشي على سطح مستوي لمسافة 100 متر**

لا يوجد ألم خفيف متوسط شديد شديد جداً

1. **مد الركبة**

لا يوجد ألم خفيف متوسط شديد شديد جداً

1. **ثني الركبة**

لا يوجد ألم خفيف متوسط شديد شديد جداً

1. **السجود**

لا يوجد ألم خفيف متوسط شديد شديد جداً

**العواطف والمشاعر**

أثناء **الأسبوع الماضي** كيف تصف (شعورك) **بسبب ركبتك** من خلال:

1. **فقدان الحماس في أداء واجباتك اليومية المعتادة**

أبدا قليل من الوقت بعض الوقت معظم الوقت كل الوقت

1. **أن أصبحت مهموم أو منفعل**

أبدا قليل من الوقت بعض الوقت معظم الوقت كل الوقت

**التصلب**

السؤال التالي متعلق **بشدة تصلب**(التيبَس) مفصل الركبة الذي عانيت منه **الأسبوع الماضي**. والتصلب هو الإحساس بالتقييد والبطء في بدء حركة مفصل الركبة

1. **ما مقدار شدة تصلب مفصل ركبتك بعد الجلوس؟**

لا يوجد تصلب خفيف متوسط شديد شديد جداً

**أنشطة الحياة اليومية والاجتماعية**

الأسئلة التالية تتعلق بالأنشطة والوظائف اليومية للفرد ومشاركته الاجتماعية (مثل الاعتناء بالنفس والتنقل والذهاب للعمل والزيارات).

أثناء **الأسبوع الماضي** كيف تصف **(درجة الصعوبة)** بسبب ركبتك من خلال الأنشطة والمهام التالية:

1. **نزول أو صعود الدرج لطابق واحد**

لا يوجد صعوبة خفيفة متوسطة شديدة شديدة جداً

1. **الثبات على وضعية واحدة**

لا يوجد صعوبة خفيفة متوسطة شديدة شديدة جداً

1. **الجلوس على الأرض (التربع)**

لا يوجد صعوبة خفيفة متوسطة شديدة شديدة جداً

1. **الأكل على الأرض**

لا يوجد صعوبة خفيفة متوسطة شديدة شديدة جداً

1. **القيام من الأرض**

لا يوجد صعوبة خفيفة متوسطة شديدة شديدة جداً

1. **القيام من الكرسي**

لا يوجد صعوبة خفيفة متوسطة شديدة شديدة جداً

1. **السجود**

لا يوجد صعوبة خفيفة متوسطة شديدة شديدة جداً

1. **الجلوس في التشهد أو بين السجدتين**

لا يوجد صعوبة خفيفة متوسطة شديدة شديدة جداً

1. **النهوض من السجود لإتمام الركعة التالية**

لا يوجد صعوبة خفيفة متوسطة شديدة شديدة جداً

1. **استخدام (الحمام العربي)**

لا يوجد صعوبة خفيفة متوسطة شديدة شديدة جداً

1. **استخدام (الحمام الإفرنجي)**

لا يوجد صعوبة خفيفة متوسطة شديدة شديدة جداً

1. **القيام ببعض الأعمال المنزلية الخفيفة مثل إعداد الطعام أو ترتيب المكتب**

لا يوجد صعوبة خفيفة متوسطة شديدة شديدة جداً

1. **القيام ببعض الأعمال المنزلية الثقيلة مثل أعمال الحديقة أو تنظيف الأرضية**

لا يوجد صعوبة خفيفة متوسطة شديدة شديدة جداً

1. **الجري**

لا يوجد صعوبة خفيفة متوسطة شديدة شديدة جداً

1. **الذهاب للأصدقاء والزيارات**

لا يوجد صعوبة خفيفة متوسطة شديدة شديدة جداً

1. **الذهاب للعمل**

لا يوجد صعوبة خفيفة متوسطة شديدة شديدة جداً

**العوامل البيئية**

الأسئلة التالية تتعلق بالعوامل البيئية التي تسهل أو تعيق التأقلم والتعايش مع المشكلة الخاصة بركبتك.

أثناء **الأربعة أسابيع الماضية** كيف تصف **(درجة التفضيل)** بسبب ركبتك من خلال العوامل التالية:

1. **الحمام (الإفرنجي) على (العربي)**

لا يوجد تفضيل خفيف متوسط شديد شديد جداً

1. **استخدام السيارة للذهاب للمسجد أو التنقل بالجوار على المشي**

لا يوجد تفضيل خفيف متوسط شديد شديد جداً

1. **استخدام العصا في الأعمال اليومية**

لا يوجد تفضيل خفيف متوسط شديد شديد جداً

1. **استخدام المصعد الكهربائي أو السلم الكهربائي على الدرج**

لا يوجد تفضيل خفيف متوسط شديد شديد جداً

**هذه الأسئلة التالية تتعلق بكيف سارت الأمور معك بسبب ركبتك خلال** الأسابيع الأربعة الماضية:

1. **إلى أي مدى تحتاج إلى وسائل مساعدة (مثل مواقف مخصصة أو مصعد) لأداء أعمالك العادية**

لا أحتاج أحتاجها بشكل أحتاجها بشكل أحتاجها بشكل أحتاجها بشكل

ابداً قليل متوسط كبير كبير جداً

1. **هل تحتاج الى مساعدة الأخرين لكي تقوم بالأنشطة اليومية المعتادة؟ (مثل دخول الحمام أو ركوب السيارة).**

لا أحتاج أحتاجها بشكل أحتاجها بشكل أحتاجها بشكل أحتاجها بشكل

ابداً قليل متوسط كبير كبير جداً

1. **هل تمنعك الركبة على الاستمتاع والتعايش اثناء حياتك اليومية العادية**

أبدا قليل من الوقت بعض الوقت معظم الوقت كل الوقت

**Appendix D:** Arabic Knee Osteoarthritis Outcome Measure – translated into English

**Arabic Knee Osteoarthritis Outcome Measure**

Name: …………………………………………………… Today’s date: .../….../……

Check mark (by ticking the appropriate box suitable for your case, only one box for each question. If you need help answering a question, please check the best answer you can.

**Body Structure**

Please answer this question based on a change in parts and composition of your knee over the **past week**.

1- Do you have swelling in your knee?

Never Rarely Sometimes Often Always

**Body Function**

Following questions related to your body function, for example, pain, emotion, and joint movement.

**Pain**

1. How often do you experience knee pain?

Never Monthly Weekly Daily Always

What amount of knee pain have you experienced the last week during the following activities?

1. Up and Dawn stairs for **One Floor**

No Pain Mild Moderate Severe Extreme

1. Walking on a flat surface for **100 meters**

No Pain Mild Moderate Severe Extreme

1. Full knee straightening

No Pain Mild Moderate Severe Extreme

1. Full knee bending

No Pain Mild Moderate Severe Extreme

1. Sujud (part of Muslim pray)

No Pain Mild Moderate Severe Extreme

**Emotion**

During **last week** how to describe your emotion because of your knee following:

1. Loss of excitement during daily activities

Never Little Time Sometime Most Time All Time

1. Have you been nervous?

Never Little time Sometime Most time All time

**Stiffness**

Next question related to the amount of knee stiffness in the last week. Stiffness is a sensation of restriction or slowness of knee joint movement.

1. What amount of severe stiffness in your knee after sitting

No stiffness Mild Moderate Severe Extreme

**Activities and Participation**

The following question relates to a person`s daily activity and community participation, for example, self-care, getting around, and going to work or visiting.

During last week how to describe the **degree of difficulty** because of your knee following activities?

1. Up and Dawn stairs for **One Floor**

No difficulty Mild Moderate Severe Extreme

1. Stay in one position

No difficulty Mild Moderate Severe Extreme

1. Sitting on the floor

No difficulty Mild Moderate Severe Extreme

1. Eating on the floor

No difficulty Mild Moderate Severe Extreme

1. Rising from the floor

No difficulty Mild Moderate Severe Extreme

1. Rising from the chair

No difficulty Mild Moderate Severe Extreme

1. Sujud (part of Muslim pray)

No difficulty Mild Moderate Severe Extreme

1. Full bending sitting (after Sujud)

No difficulty Mild Moderate Severe Extreme

1. Rising from Sujud

No difficulty Mild Moderate Severe Extreme

1. Using the Arabic toilet (squat toilet)

No difficulty Mild Moderate Severe Extreme

1. the Use western toilet (flush toilet)

No difficulty Mild Moderate Severe Extreme

1. Doing some light household activities such as cooking or office arrangement

No difficulty Mild Moderate Severe Extreme

1. Doing some heavy household activities such as Garden work or floor cleaning

No difficulty Mild Moderate Severe Extreme

1. Running

No difficulty Mild Moderate Severe Extreme

1. Going to visit friends

No difficulty Mild Moderate Severe Extreme

1. Going to work

No difficulty Mild Moderate Severe Extreme

**Environment Factors**

The following questions relate to environmental factors that facilitate or hinder the adaption to your knee problem.

During **last week** how to describe the **degree of preference** because of your knee’s following factors?

1. Prefer the western toilet (flush) over the Arabic toilet (squat)

No prefer Mild Moderate Severe Extreme

1. Prefer to use the car to go to the Masjed (Mosque) or get around by walking

No prefer Mild Moderate Severe Extreme

1. Prefer to use the cane during daily activities

No prefer Mild Moderate Severe Extreme

1. Using the elevator on the stairs

No prefer Mild Moderate Severe Extreme

The following questions relate to how things have been going with you because of your knee over **the past four weeks**:

1. How much you need aids (such as dedicated parking or an elevator) during daily normal activities

No Need Mild Need Moderate Need Sever Need Extreme Need

1. Do you need the help of others to carry out your usual daily activities? (e.g., going to the bathroom or getting in a car)

No Need Mild Need Moderate Need Sever Need Extreme Need

1. Does your knee prevent you from enjoying and adapting to your everyday daily life?

Never Little Time Sometime Most Time All Time
